# Supplementary material
Source: PubMed Central journal article supplement (PMC3551984)
Supplement: NIHMS418260-supplement-Supplementary_Data.pdf [file NIHMS418260-supplement-Supplementary_Data.pdf]

## Supporting Information

# Towards Optimal Fragment Generations for *Ab Initio* Protein Structure Assembly

Dong Xu and Yang Zhang

**Figure S1.** RMSD of fragments of different lengths retrieved by using 6 features.

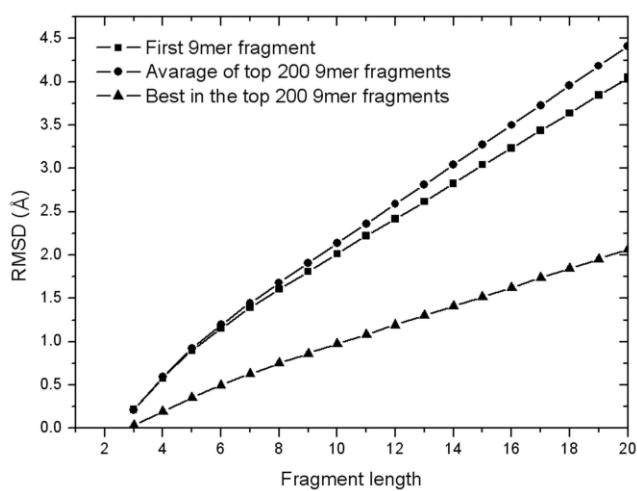

**Table S1.** Accurately predicted distances ( $<1 \text{ \AA}$  to the real value) which correspond to the maximum numbers in the distance profiles for the three CASP9 free-modeling targets.

| T0553-D2                      |               |                       |                            |           |
|-------------------------------|---------------|-----------------------|----------------------------|-----------|
| #C $\alpha_i$                 | #C $\alpha_j$ | Real ( $\text{\AA}$ ) | Predicted ( $\text{\AA}$ ) | Max. Num. |
| 72                            | 81            | 6.41                  | 5.75                       | 25        |
| 86                            | 94            | 7.14                  | 6.75                       | 241       |
| 87                            | 92            | 5.25                  | 5.25                       | 1369      |
| 87                            | 93            | 6.23                  | 5.75                       | 662       |
| 106                           | 115           | 6.13                  | 6.75                       | 103       |
| Region [243, 288] of T0571-D2 |               |                       |                            |           |
| 244                           | 261           | 5.82                  | 5.75                       | 17        |
| 244                           | 263           | 6.33                  | 5.75                       | 83        |
| 244                           | 260           | 6.59                  | 6.25                       | 15        |
| 245                           | 260           | 5.52                  | 5.75                       | 76        |
| 245                           | 261           | 5.32                  | 5.25                       | 50        |
| 245                           | 262           | 6.46                  | 5.75                       | 60        |
| 246                           | 258           | 7.02                  | 7.25                       | 142       |
| 246                           | 259           | 5.75                  | 5.75                       | 206       |
| 246                           | 260           | 4.21                  | 4.75                       | 83        |
| 246                           | 261           | 6.37                  | 5.75                       | 101       |
| 247                           | 258           | 5.72                  | 5.75                       | 447       |
| 247                           | 259           | 5.55                  | 5.25                       | 283       |
| 247                           | 260           | 6.10                  | 6.75                       | 144       |
| 247                           | 261           | 7.82                  | 7.75                       | 50        |
| 248                           | 256           | 5.97                  | 6.75                       | 813       |
| 248                           | 257           | 5.19                  | 5.75                       | 913       |
| 248                           | 258           | 4.30                  | 4.75                       | 520       |
| 248                           | 259           | 6.10                  | 6.25                       | 373       |
| 249                           | 256           | 5.51                  | 5.75                       | 1758      |
| 249                           | 257           | 5.32                  | 5.25                       | 1514      |
| 249                           | 258           | 6.78                  | 6.25                       | 684       |
| 250                           | 255           | 5.39                  | 5.25                       | 2094      |
| 250                           | 256           | 4.66                  | 4.25                       | 1866      |
| 250                           | 257           | 5.88                  | 6.25                       | 949       |
| 251                           | 256           | 6.60                  | 6.75                       | 1552      |
| 251                           | 257           | 6.75                  | 6.75                       | 700       |
| 265                           | 270           | 5.83                  | 5.75                       | 2233      |
| 265                           | 271           | 4.30                  | 4.75                       | 2310      |
| 265                           | 272           | 6.75                  | 6.25                       | 1371      |
| 264                           | 271           | 5.14                  | 5.75                       | 2503      |
| 264                           | 272           | 5.37                  | 5.25                       | 2075      |
| 264                           | 273           | 6.44                  | 6.75                       | 1073      |
| 264                           | 270           | 8.38                  | 8.25                       | 2538      |
| 263                           | 271           | 6.15                  | 6.75                       | 1109      |
| 263                           | 272           | 5.91                  | 5.75                       | 1367      |

|          |     |      |      |      |
|----------|-----|------|------|------|
| 263      | 273 | 4.72 | 4.75 | 771  |
| 263      | 274 | 6.28 | 6.75 | 507  |
| 262      | 273 | 5.77 | 5.75 | 737  |
| 262      | 274 | 4.92 | 5.25 | 590  |
| 262      | 275 | 5.47 | 6.25 | 234  |
| 261      | 275 | 4.90 | 4.75 | 139  |
| 261      | 274 | 5.86 | 5.75 | 323  |
| 261      | 273 | 6.83 | 6.75 | 263  |
| 260      | 275 | 6.55 | 5.75 | 101  |
| 260      | 276 | 4.75 | 5.25 | 46   |
| 275      | 281 | 5.66 | 6.25 | 548  |
| 274      | 284 | 7.16 | 6.25 | 53   |
| 273      | 285 | 5.53 | 6.25 | 25   |
| 272      | 285 | 4.38 | 5.25 | 30   |
| 272      | 284 | 5.81 | 6.25 | 26   |
| T0604-D1 |     |      |      |      |
| 11       | 71  | 7.05 | 6.25 | 45   |
| 12       | 69  | 4.93 | 5.75 | 14   |
| 13       | 69  | 6.13 | 6.25 | 14   |
| 14       | 68  | 6.53 | 5.75 | 18   |
| 15       | 67  | 6.33 | 6.25 | 17   |
| 15       | 68  | 8.67 | 8.25 | 18   |
| 16       | 66  | 6.25 | 5.75 | 18   |
| 17       | 66  | 6.54 | 5.75 | 24   |
| 19       | 26  | 7.64 | 8.25 | 93   |
| 32       | 40  | 8.23 | 8.25 | 587  |
| 32       | 43  | 8.34 | 7.75 | 242  |
| 33       | 38  | 4.97 | 5.25 | 2298 |
| 33       | 39  | 5.65 | 5.75 | 1238 |
| 51       | 63  | 5.72 | 4.75 | 21   |
| 53       | 64  | 5.35 | 5.75 | 14   |
| 53       | 62  | 5.80 | 5.25 | 63   |
| 55       | 61  | 7.31 | 7.75 | 135  |
| 79       | 90  | 7.17 | 6.25 | 48   |
